# Supplementary material for: Role of positional isomerism in A-site organic cation: structural variation driven photophysical and ferroelectric responses in centrosymmetric layered perovskites
Source: Royal Society of Chemistry journal article supplement (doi:10.1039/d5tc03431k), 2026-01-01
Supplement: d5tc03431k1.pdf [file d5tc03431k1.pdf]

## Supporting Information

### **Role of positional isomerism on A-site organic cation: structural variation driven photophysical and ferroelectric responses in centrosymmetric layered perovskites**

Vishal Singh<sup>a</sup>, Poonam Moar<sup>b</sup>, Dirtha Sanyal<sup>c,d</sup>, Sourabh Barua<sup>b</sup> and Joydeep Dhar<sup>\*a</sup>

<sup>a</sup>*Department of Chemistry, Birla Institute of Technology, Mesra, Ranchi, 835215, India.*

<sup>b</sup>*Department of Physics, Central University of Punjab, Bathinda, 151401, India.*

<sup>c</sup>*Variable Energy Cyclotron Centre, 1/AF, Bidhannagar, Kolkata, 700064, India.*

<sup>d</sup>*Homi Bhabha National Institute, Training School Complex, Anushakti Nagar, Mumbai, 400094, India.*

<sup>\*</sup>Corresponding author *E-mail address: joydeepdhar@bitmesra.ac.in*

**Table S1** Crystallographic data and structure refinement for single-layered ortho and para-fluoro NMPM-based perovskites obtained by analysing single-crystal XRD data measured at 298 K.

|                                   | orthoF_S-1                                                                                                          | metaF_S-2                                                                                 | paraF_S-3                                                                                 |
|-----------------------------------|---------------------------------------------------------------------------------------------------------------------|-------------------------------------------------------------------------------------------|-------------------------------------------------------------------------------------------|
| CCDC number                       | 2427201                                                                                                             | 1845548*                                                                                  | 2376464                                                                                   |
| Chemical formula                  | C <sub>16</sub> H <sub>22</sub> Br <sub>6</sub> F <sub>2</sub> N <sub>2</sub> Pb <sub>2</sub>                       | C <sub>16</sub> H <sub>22</sub> Br <sub>4</sub> F <sub>2</sub> N <sub>2</sub> Pb          | C <sub>16</sub> H <sub>22</sub> Br <sub>4</sub> F <sub>2</sub> N <sub>2</sub> Pb          |
| Formula weight                    | 1174.19 g/mol                                                                                                       | 807.18 g/mol                                                                              | 807.18 g/mol                                                                              |
| Temperature                       | 298 K                                                                                                               | 293 K                                                                                     | 293 K                                                                                     |
| Wavelength                        | 1.54178                                                                                                             | 0.71073                                                                                   | 0.71073                                                                                   |
| Crystal system                    | Triclinic                                                                                                           | Orthorhombic                                                                              | Orthorhombic                                                                              |
| Space group                       | P-1                                                                                                                 | Pbcn                                                                                      | Pbcn                                                                                      |
| Unit cell dimensions              | a = 7.4391(8) Å;<br>α = 99.917° (2)<br>b = 7.4427(8) Å;<br>β = 99.902° (2)<br>c = 13.4802(15) Å;<br>γ = 108.295(2)° | a = 7.9738(5) Å;<br>α = 90°<br>b = 8.8741(6) Å;<br>β = 90°<br>c = 32.445(3) Å;<br>γ = 90° | a = 8.0826(6) Å;<br>α = 90°<br>b = 8.8187(6) Å;<br>β = 90°<br>c = 32.159(3) Å;<br>γ = 90° |
| Volume                            | 677.35(13) Å <sup>3</sup>                                                                                           | 2295.8(3)                                                                                 | 2292.2(3) Å <sup>3</sup>                                                                  |
| Z                                 | 1                                                                                                                   | 4                                                                                         | 4                                                                                         |
| Density (calculated)              | 2.879 g/cm <sup>3</sup>                                                                                             | 2.335 g/cm <sup>3</sup>                                                                   | 2.339 g/cm <sup>3</sup>                                                                   |
| Absorption coefficient            | 34.427 mm <sup>-1</sup>                                                                                             | 14.329 mm <sup>-1</sup>                                                                   | 14.351 mm <sup>-1</sup>                                                                   |
| F (000)                           | 524.0                                                                                                               | 1488                                                                                      | 1488                                                                                      |
| Measured Theta range              | 3.430 to 68.313°                                                                                                    | 2.846 to 25.116°                                                                          | 3.419 to 24.998°                                                                          |
| Absorption correction             | Multi-Scan                                                                                                          | Multi-Scan                                                                                | Multi-Scan                                                                                |
| Goodness-of-fit on F <sup>2</sup> | 1.090                                                                                                               | 1.068                                                                                     | 1.108                                                                                     |
| Final indices; I>2σ(I)            | R1 = 0.0558;<br>wR2 = 0.1602                                                                                        | R1 = 0.0571;<br>wR2 = 0.1445                                                              | R1 = 0.0674;<br>wR2 = 0.2039                                                              |
| All data                          | R1 = 0.0559;<br>wR2 = 0.1602                                                                                        | R1 = 0.0716<br>wR2 = 0.1579                                                               | R1 = 0.0940<br>wR2 = 0.2313                                                               |
| Largest diff. peak and hole       | 3.109 and -1.534                                                                                                    | 1.554 and -2.002                                                                          | 2.448 and -4.734                                                                          |

$w = 1/[\sigma^2(F_o^2) + (0.0973P)^2 + 7.1224P]$  (for ortho);  $w = 1/[\sigma^2(F_o^2) + (0.0790P)^2]$  (for meta);  $w = 1/[\sigma^2(F_o^2) + (0.1087P)^2 + 20.9475P]$  (for para) where  $P = (F_o^2 + 2F_c^2)/3$

\* The CCDC number was from the previously reported literature.<sup>1</sup>

\* The crystal data were from the experimentally recorded data of the prepared single crystal.

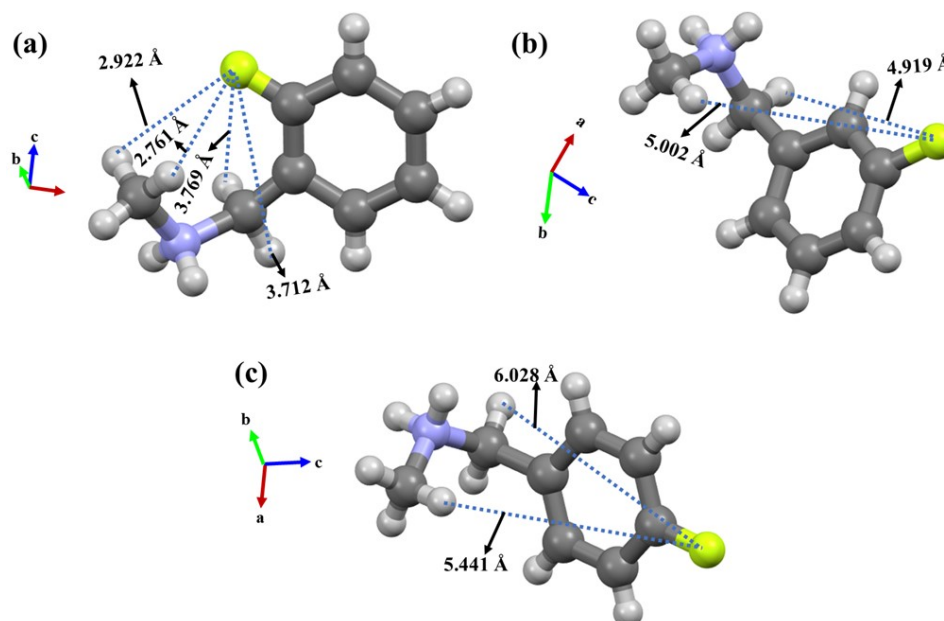

**Figure S1:** Intramolecular C-F...H-C interaction in a) orthoF b) metaF and c) paraF NMPM organic cations.

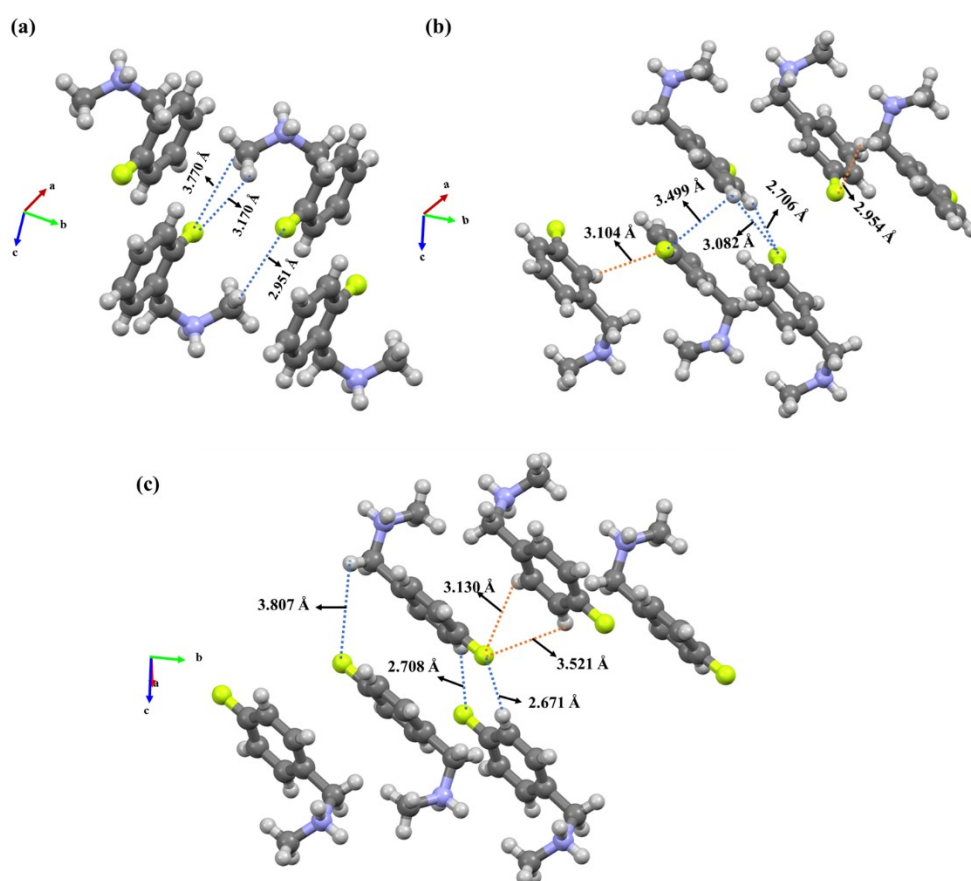

**Figure S2:** The weak intermolecular van der Waals C-F...H-C interactions link the spacer cations into a cohesive bilayer network. Orange dashed lines show interaction between organic cations of the same layer, whereas the blue dashed line indicates the interaction between two anti-parallel organic layers.

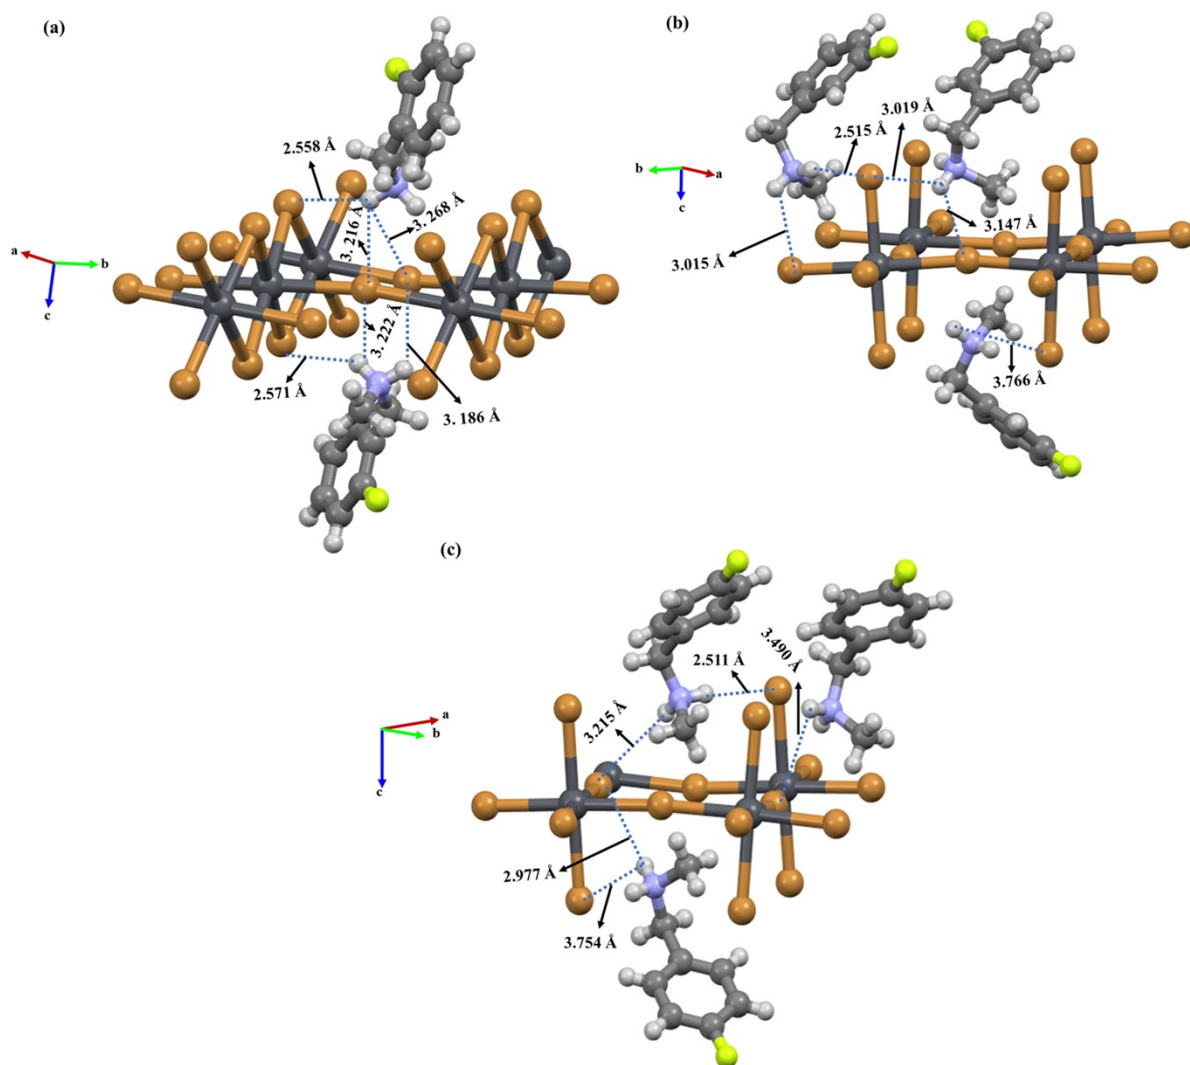

**Figure S3:** Intermolecular N-H---Br interaction in a) S-1 b) S-2 and c) S-3 showing the nearest interaction being in S-3 as compared to S-2 and S-1.

**Table S2:** Pb-Br bond lengths considered for the calculation of distortion indices in a) S-1 b) S-2 and c) S-3.

| S-1 (Å) | S-2 (Å) | S-3 (Å) |
|---------|---------|---------|
| 3.02400 | 3.09100 | 3.07500 |
| 3.02400 | 3.09100 | 3.07500 |
| 3.03000 | 3.01000 | 3.02000 |
| 3.03000 | 3.01000 | 3.02000 |
| 3.03500 | 2.90800 | 2.93600 |
| 3.03500 | 2.90800 | 2.93600 |

**Table S3:** Br-Pb-Br bond angles considered for the calculation of angle variance in a) S-1 b) S-2 and c) S-3.

| S-1    | S-2    | S-3    |
|--------|--------|--------|
| 86.99° | 89.78° | 90.89° |
| 86.99° | 89.99° | 94.6°  |
| 87.35° | 95.6°  | 89.66° |
| 87.35° | 95.6°  | 90.89° |
| 88.82° | 73.87° | 89.55° |
| 88.82° | 90.47° | 94.6°  |
| 91.18° | 90.47° | 89.66° |
| 91.18° | 89.99° | 75.39° |
| 92.65° | 89.73° | 89.81° |
| 92.65° | 94.92° | 89.55° |
| 93.01° | 89.73° | 89.81° |
| 93.01° | 89.78° | 95.41° |

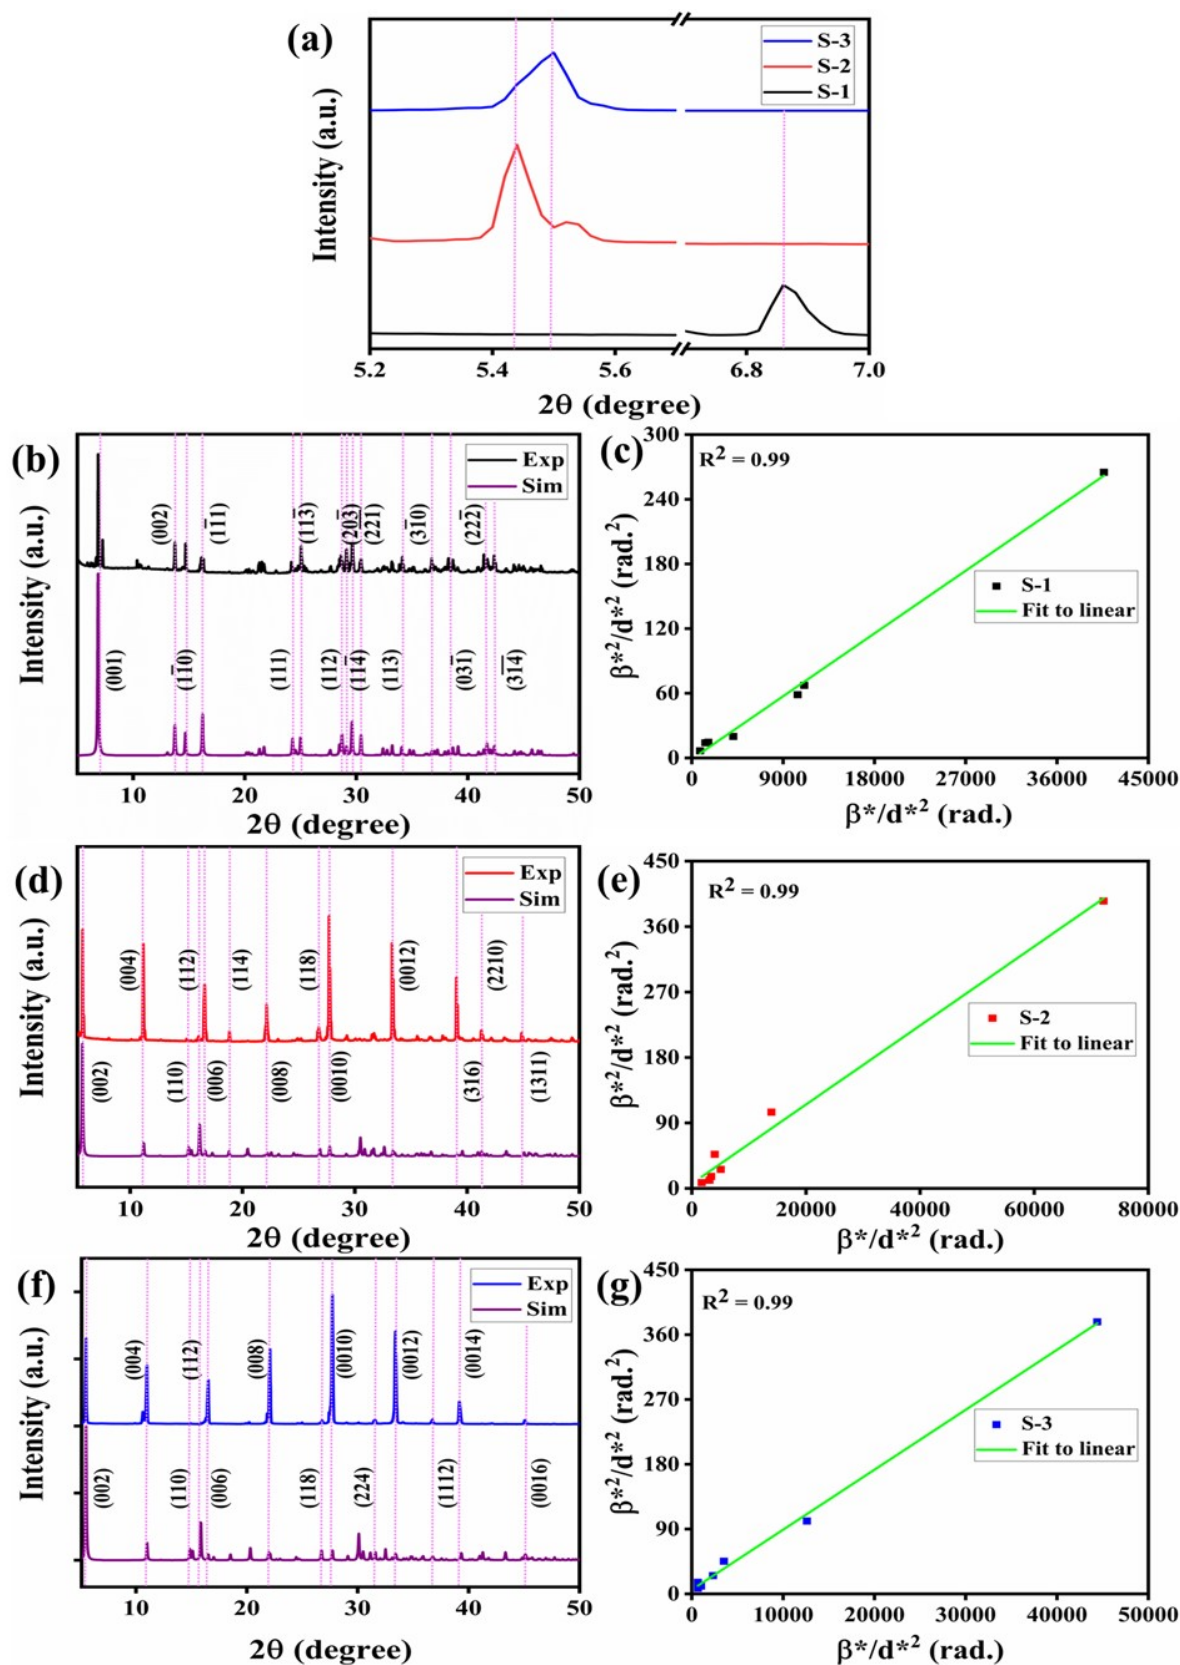

**Figure S4:** (a) Showing shifting of (002) diffraction peak of S-3 concerning S-2, for phase purity experimentally measured powder XRD spectra (Exp) compared with the simulated (Sim) in (b), (d) and (f) for S-1, S-2 and S-3, respectively. Crystallite size was calculated using Halder-Wagner Plots for S-1 (c), S-2 (e) and S-3 (g).

**Table S4:** Average crystallite size measured using PXRD

| Sample | Avg. crystallite size (nm) |
|--------|----------------------------|
| S-1    | 153.85                     |
| S-2    | 185.19                     |
| S-3    | 120.48                     |

**Table S5:** Assignment of some characteristic vibrational modes

| Vibration modes                | Wavenumber (cm <sup>-1</sup> ) |
|--------------------------------|--------------------------------|
| N-H stretching                 | ~3120                          |
| -CH <sub>2</sub> - stretching  | ~2990                          |
| -CH <sub>3</sub> stretching    | ~2790                          |
| C-H bending (aromatic ring)    | ~1580, 1514, 1450              |
| C-C stretching (aromatic ring) | ~1395                          |
| C-F stretching                 | ~1250                          |
| C-N stretching                 | ~1120                          |

**Table S6:** Radiative ( $k_{\text{rad.}}$ ) and nonradiative ( $k_{\text{nonrad.}}$ ) rate constants of S-1, S-2 and S-3

| Sample | $k_{\text{rad.}}$ (x 10 <sup>6</sup> s <sup>-1</sup> ) | $k_{\text{nonrad.}}$ (x 10 <sup>8</sup> s <sup>-1</sup> ) |
|--------|--------------------------------------------------------|-----------------------------------------------------------|
| S-1    | 0.2                                                    | 0.32                                                      |
| S-2    | 3.1                                                    | 1.38                                                      |
| S-3    | 4.6                                                    | 1.03                                                      |

The following equations were used to calculate the rate constants,<sup>2</sup>

$$k_{\text{nonrad.}} = (1 - \varphi)/\tau_{\text{avg}} \quad \text{.....(ES1)}$$

$$k_{\text{rad.}} = \left(1/\tau_{\text{avg}}\right) - k_{\text{nonrad.}} \quad \text{.....(ES2)}$$



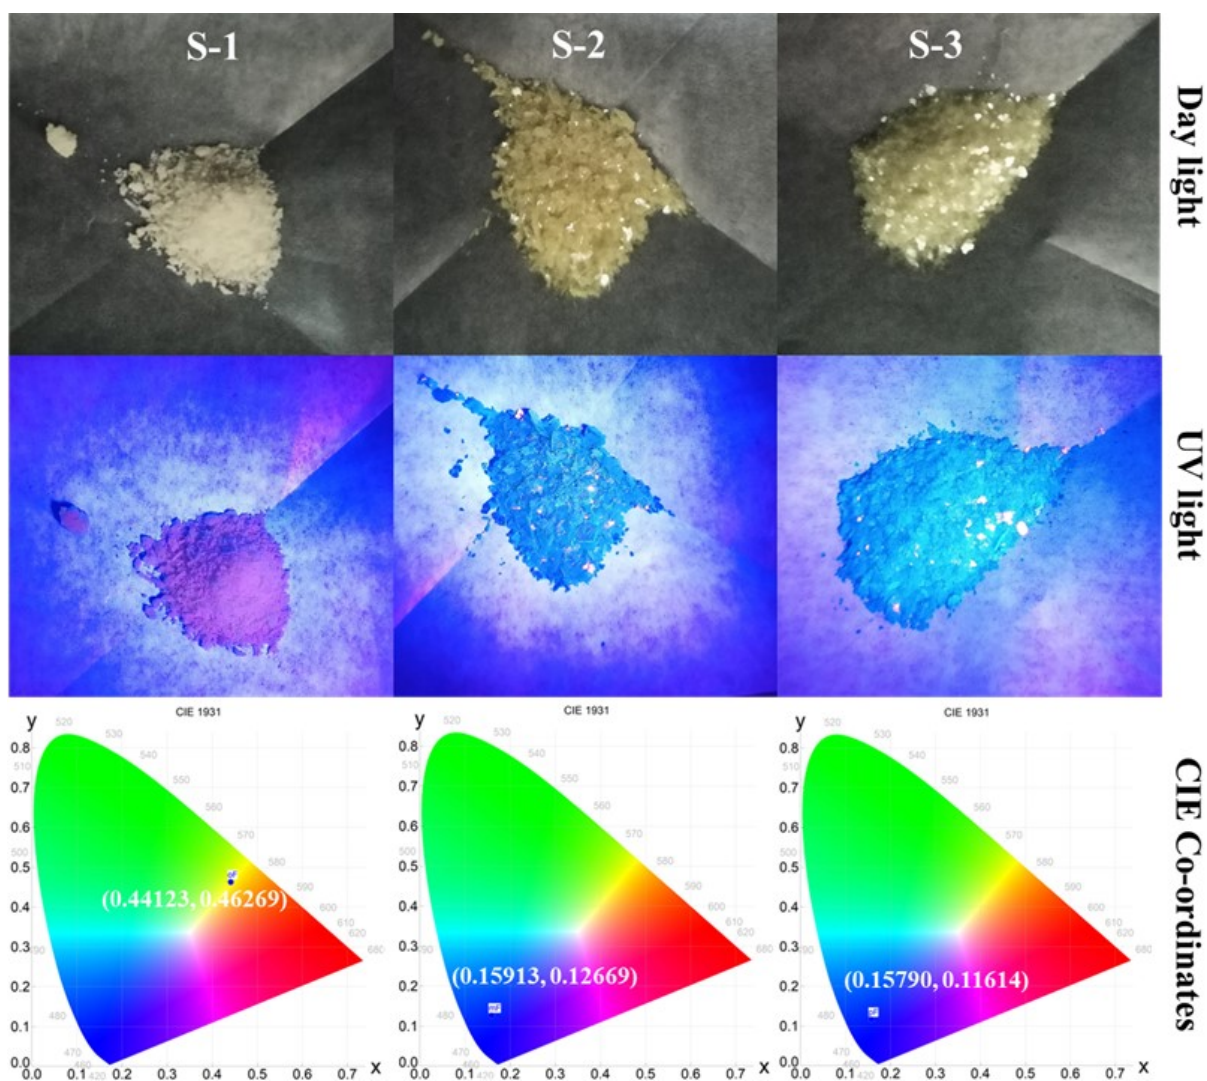

**Figure S5:** Daylight, UV light photographs and corresponding CIE-co-ordinates of each sample with S-1, S-2, and S-3 being marked as oF, mF and pF, respectively.



**Table S7:** Entropy of fusion of each of the three samples

$$\Delta S_{fusion} = \frac{\Delta H_{fusion}}{T} \dots\dots(ES3)$$

| Sample | $\Delta S_{fusion}$ KJ mol <sup>-1</sup> K <sup>-1</sup> |
|--------|----------------------------------------------------------|
| S-1    | 0.085                                                    |
| S-2    | 0.084                                                    |
| S-3    | 0.109                                                    |

**Table S8:** Fitting parameters of the equivalent circuit under dark and light conditions

| Sample      | R <sub>1</sub> (Ω) | C <sub>1</sub> | R <sub>2</sub> (Ω) | Q        | n     |
|-------------|--------------------|----------------|--------------------|----------|-------|
| S-1 (dark)  | 119                | 5.034E-10      | 1306.0             | 6.686E-5 | 0.763 |
| S-1 (light) | 115                | 5.055E-10      | 1296.3             | 7.121E-5 | 0.776 |
| S-2 (dark)  | 115                | 2.529E-10      | 2530.8             | 7.683E-5 | 0.694 |
| S-2 (light) | 113                | 2.534E-10      | 2508.6             | 7.737E-5 | 0.725 |
| S-3 (dark)  | 100                | 2.360E-10      | 2405.8             | 8.316E-5 | 0.681 |
| S-3 (light) | 100                | 2.394E-10      | 2380.3             | 7.729E-5 | 0.739 |

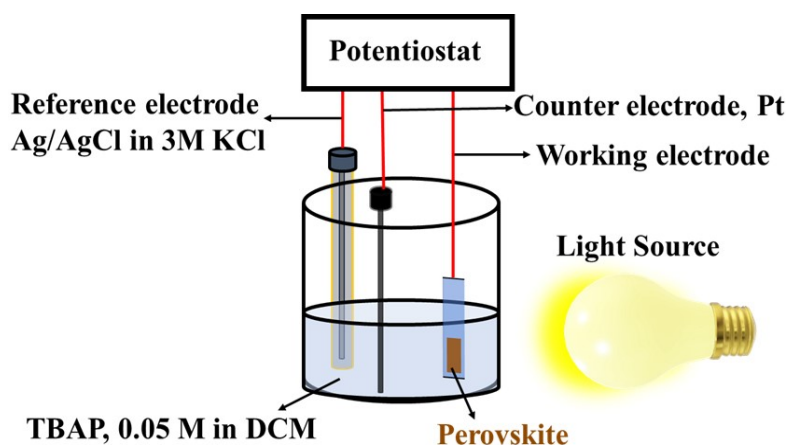**Figure S6:** Device set-up used for performing EIS and Chronoamperometric tests.

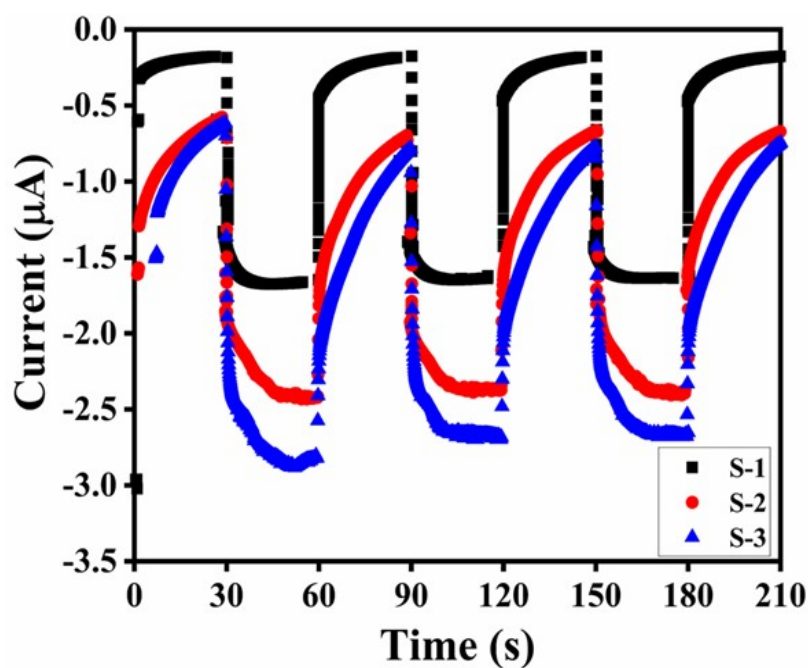

**Figure S7:** Chronoamperometric i-t curve as recorded.

$$\text{photosensitivity} = \frac{|I_D - I_L|}{I_D} \quad \text{.....(ES4)}$$

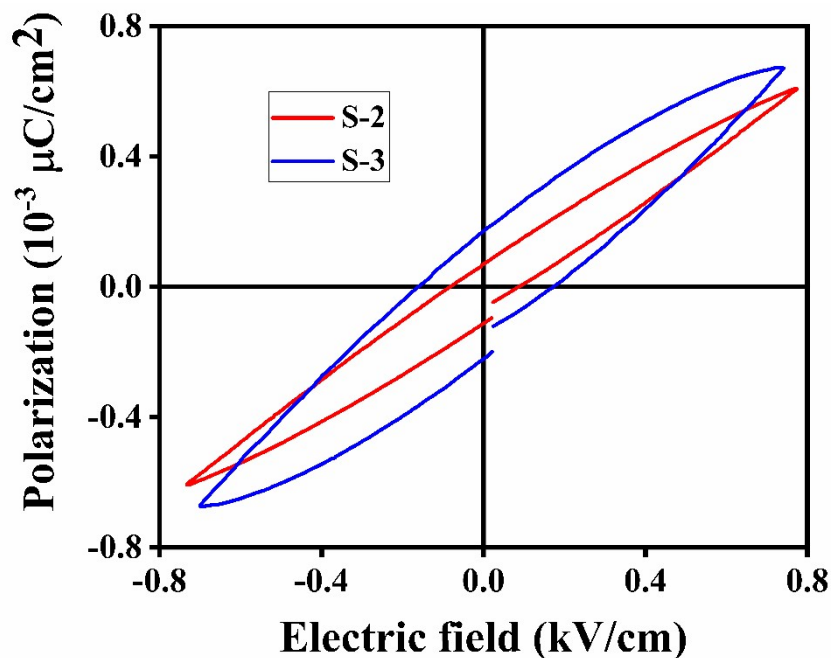

**Figure S8:** P-E loop for S-2 and S-3.

## References

1. Y. Hao, S. Wen, J. Yao, Z. Wei, X. Zhang, Z. Jiang, Y. Mei and H. Cai, *J. Solid State Chem.*, 2019, **270**, 226-230.
2. J. R. Lakowicz, *Principles of fluorescence spectroscopy*, Springer, 2006.
